# Supplementary material for: Serum expression of Vascular Endothelial-Cadherin, CD44, Human High mobility group B1, Kallikrein 6 proteins in different stages of laryngeal intraepithelial lesions and early glottis cancer
Source: PeerJ. 2022 Apr 19;10:e13104. doi: 10.7717/peerj.13104 (PMC9029362; doi:10.7717/peerj.13104)
Supplement: Supplemental Information 1 [file peerj-10-13104-s001.xlsx]

## Sheet: Data
No	HMGB-1	KLK6	VE-cad	CD44	IHC_stage	Sex	Age	Smoking	GERD
1	27.156	0.25	1.926	2.24	2	M	74	1	0
2	30.308	0.25	0.962	2.46	2	M	70	1	0
3	33.052	2.317	1.329	2.71	4	M	59	0	0
4	101.235	45.406	0.15	2.19	4	F	60	1	1
5	20.375	1.195	0.962	0.68	1	M	73	1	0
6	24.486	0.769	0.931	7.18	4	F	60	1	0
7	23.391	1.352	0.977	1.69	1	M	89	1	0
8	21.081	1.352	1.151	1.11	1	M	74	1	0
9	2	0.921	1.065	1.25	3	M	70	0	0
10	35.283	2.693	1.735	6.62	4	M	34	0	0
11	2	1.163	0.885	1.68	1	M	49	1	0
12	25.308	2.413	1.624	2.41	4	M	59	1	0
13	26.21	0.728	0.788	1.67	1	M	79	1	1
14	25.543	1.352	0.992	1.37	4	F	81	1	0
15	6.635	3.329	1.843	2.11	2	M	86	0	1
16	16.228	0.347	1.434	2.63	4	M	68	0	0
17	24.251	1.13	2.469	1.52	1	F	66	0	0
18	32.927	1.13	1.686	0.4	1	M	70	1	0
19	28.903	1.888	0.181	2.67	1	M	76	1	0
20	34.688	1.195	1.661	1.47	1	M	72	1	0
21	32.927	1.096	1.316	3.21	1	M	80	1	0
22	30.026	1.53	1.329	1.62	1	F	67	0	0
23	39.505	1.616	1.08	6.58	1	M	68	0	0
24	28.146	3.093	2.292	2.8	2	M	65	1	0
25	51.718	1.413	1.036	2.44	1	M	52	1	0
26	30.51	0.25	1.207	2.36	1	M	70	0	0
27	31.486	1.195	1.369	0.98	1	F	70	0	0
28	58.709	11.669	8.31	0.37	1	M	89	1	0
29	27.987	0.25	0.669	2.43	1	M	70	1	0
30	27.156	0.25	0.558	1.61	1	M	60	1	0
31	24.603	0.25	0.821	2.24	4	M	73	1	0
32	24.525	0.728	1.065	1.118	1	M	76	1	0
33	38.963	5.299	4.09	1.58	4	M	87	0	0
34	200	70	40	2.46	1	M	70	1	0
35	34.013	2.17	0.853	1.71	1	M	51	0	0
36	118.939	70	40	1.56	1	M	68	1	0
37	34.35	0.993	0.931	1.42	1	M	69	1	0
38	200	70	40	1.11	4	F	61	1	0
39	35.755	6.059	4.349	3.14	1	M	77	0	0
40	30.227	5.186	3.697	2.3	1	M	63	1	0
41	25.582	1.195	1.007	2.04	1	F	66	1	0
42	200	70	40	1.42	2	F	73	0	0
43	29.623	1.195	1.022	1.27	1	F	60	1	1
44	26.958	0.993	0.992	1.99	1	F	90	0	0
45	200	70	40	3.04	1	M	61	1	0
46	28.544	0.347	0.992	3.71	1	M	63	1	0
47	48.179	7.461	4.432	1.87	1	M	34	0	0
48	20.806	0.808	1.109	1.77	1	M	68	1	0
49	23.899	1.291	0.414	1.45	1	M	45	1	0
50	78.971	15.699	7.102	1.17	2	M	65	0	1
51	91.776	21.427	14.194	3.06	4	F	59	1	0
52	39.369	2.196	2.213	1.85	1	M	66	1	0
53	31.855	0.993	0.788	2.89	1	F	64	1	0
54	30.551	0.6	1.316	3.27	3	M	74	0	0
55	19.978	0.554	1.316	0.87	4	F	58	1	0
56	26.998	2.601	1.984	1.38	3	M	61	1	0
57	38.291	8.224	4.817	3.61	4	F	48	1	0
58	183.234	69.215	33.112	1.5	4	F	80	0	1
59	200	70	40	3.44	3	F	67	1	0
60	200	70	40	2.55	3	M	35	1	0
61	32.72	1.727	1.151	2.97	4	M	59	1	0
62	27.512	1.163	1.109	0.95	1	F	54	1	0
63	27.195	0.347	0.296	3.91	4	F	66	1	1
64	29.664	0.993	1.302	1.55	4	F	51	1	0
65	75.489	11.532	4.328	1.73	4	F	56	1	0
66	30.51	1.7	0.458	3.9	4	M	82	0	1
67	22.961	0.808	1.473	0.78	2	M	59	0	0
68	32.307	1.616	0.721	1.58	4	F	60	0	1
69	24.681	2.554	1.207	0.76	4	M	74	1	1
70	200	70	40	1.2	2	M	68	1	1
71	26.683	2.018	0.821	1.65	1	M	81	0	0
72	31.241	0.25	1.356	1.52	4	M	61	1	0
73	28.743	1.727	1.179	3.35	4	M	56	0	0
74	36.402	2.806	0.704	0.92	4	F	50	1	1
75	41.627	6.315	4.183	1.46	4	M	71	1	1
76	25.857	1.727	1.207	1.38	4	M	65	0	0
77	27.314	1.835	0.651	1.85	3	M	66	1	0
78	39.869	7.806	4.183	1.29	1	M	24	0	0
79	197.189	55.596	40	3.1	4	F	39	0	0
80	28.703	0.957	0.931	0.98	1	F	74	0	0

## Sheet: Legend
Column	Value	Definition
IHC_stage	1	Invasive cancer
	2	High-grade dysplasia
	3	Low-grade dysplasia
	4	No dysplasia
Sex	M	Male
	F	Female
Smoking	0	No
	1	Yes
GERD	0	No
	1	Yes
